# Supplementary material for: The boosted adsorption of uranium( vi ) on phosphorylated Fe 3 O 4 @MnO 2 @UiO-66-(OH) 2
Source: Royal Society of Chemistry journal article supplement (doi:10.1039/d5nr04596g), 2026-01-01
Supplement: d5nr04596g1.pdf [file d5nr04596g1.pdf]

# Supplementary Material

**The boosting adsorption of uranium (VI) on phosphorylated**

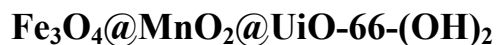

Keda Zhu, Maoning Xu, Quanqi Yang, Zhengwen Han, Wanjing Jia, Jianjun Wang\*

College of Environmental Science and Engineering, North China Electric Power

University, Beijing, China, 102206.

## S1 Characterization of FMU-P

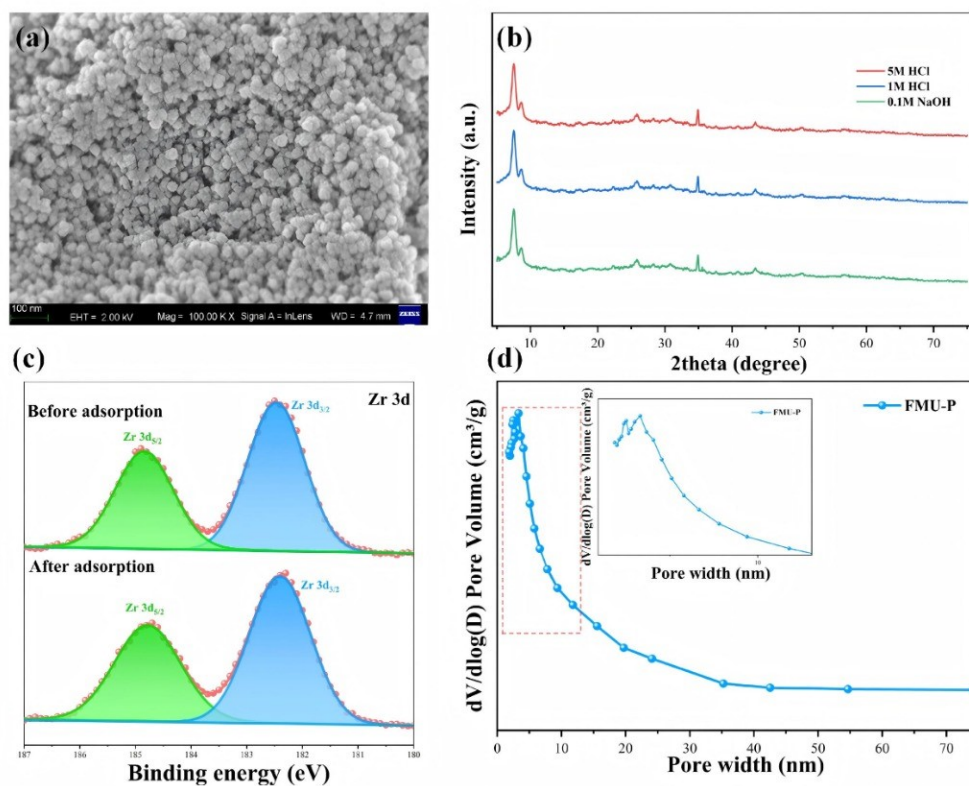

**Figure. S1** Characterization of FMU-P (a) SEM; (b) XRD after acid-based treatment; (c) XPS Zr 3d; (d) pore width of FMU-P.

## S2 Langmuir and Freundlich isothermal models

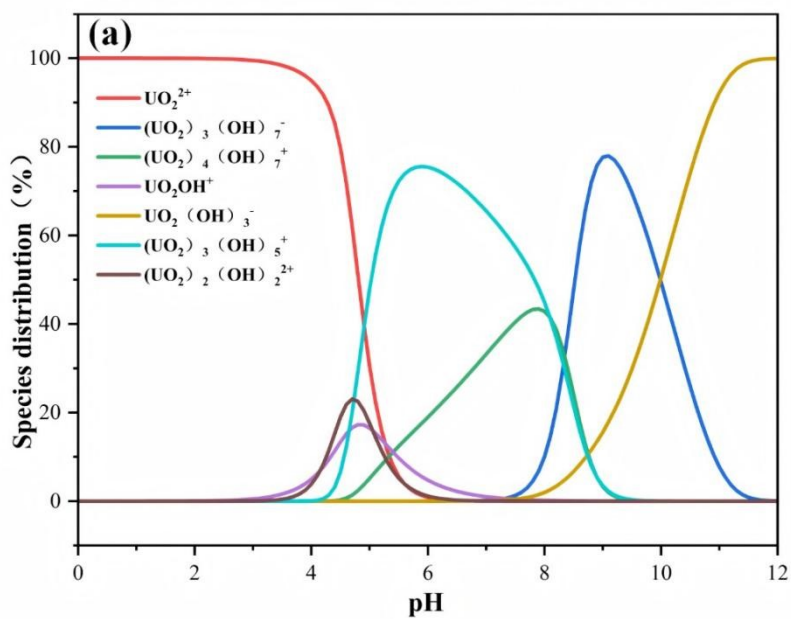

**Figure. S2** (a) distribution of U(VI) at different pH.

**Table S1** Isothermal model fitting of U(VI) on FMU and FMU-P.

| Adsorbent    | Langmuir Fitting |        |        | Freundlich Fitting |        |        |
|--------------|------------------|--------|--------|--------------------|--------|--------|
|              | $q_e$            | $R^2$  | $b$    | $K_F$              | $1/n$  | $R^2$  |
|              | (mg/g)           |        |        |                    |        |        |
| 298.15K FMUP | 697.7732         | 0.9882 | 0.5002 | 251.8593           | 2.9455 | 0.9354 |
| 313.15K FMUP | 743.8239         | 0.9907 | 0.5704 | 333.3047           | 3.9606 | 0.9234 |
| 298.15K FMU  | 367.1557         | 0.9753 | 0.1807 | 107.3196           | 3.4057 | 0.9729 |
| 313.15K FMU  | 394.2757         | 0.9059 | 0.4257 | 145.1671           | 3.6649 | 0.9519 |

### S3 Magnetic Recovery Effect Demonstration

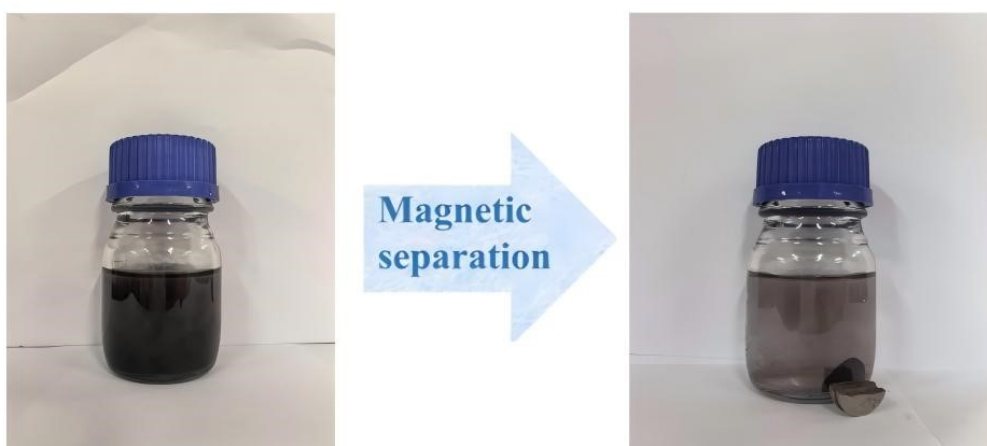

**Figure. S3** magnetic recovery effect demonstration.

#### **S4 Adsorption capacity and BET data after acid-base treatment**

The chemical stability of FMU-P under strong acid and basic conditions was conducted as following: 20 mg of FMU-P was dissolved completely into 5 M HCl, 1 M HCl and 0.1 M NaOH solution and reacted for 24 h. Subsequently, adsorption tests were conducted. Adsorption fitting results were shown in Figure.S4 and Table S2. Table S3 was the pore size and specific surface area of FMU-P after acid-based treatment. The values decreased compared with

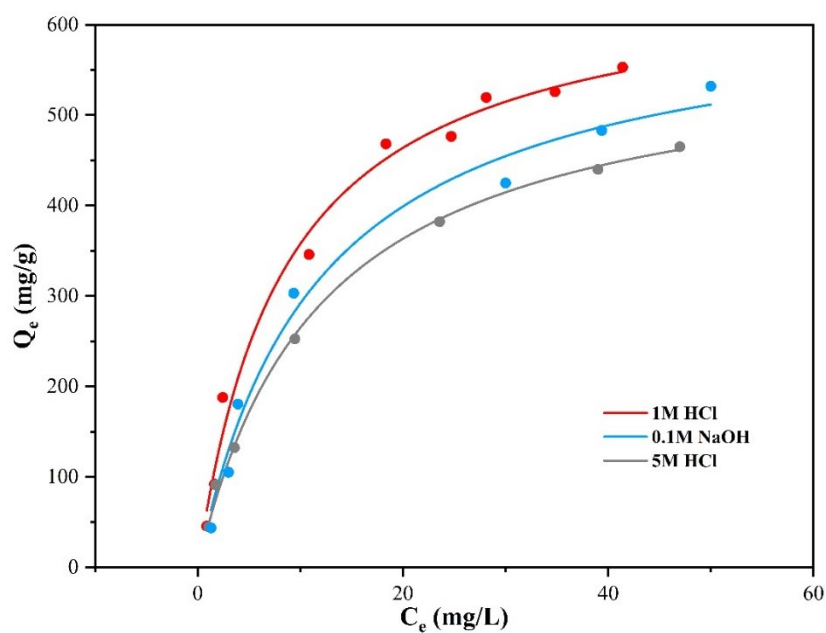

**Figure. S4** Langmuir model fitting of U(VI) on FMU-P after acid-base treatment

**Table S2** Langmuir model fitting of U(VI) on FMU-P after acid-base treatment

| FMU-P         | $q_e$<br>(mg/g) | $R^2$  | b       | Degree<br>of<br>decline<br>(%) |
|---------------|-----------------|--------|---------|--------------------------------|
| 5M HCl 24h    | 578.0586        | 0.9877 | 0.08464 | 17.15                          |
| 1M HCl 24h    | 659.9305        | 0.9890 | 0.1183  | 5.42                           |
| 0.1M NaOH 24h | 630.4562        | 0.9853 | 0.08625 | 9.65                           |

**Table S3** The pore size and specific surface area of FMU-P

| FMU-P         | Pore size<br>(nm) | specific<br>surface<br>area<br>(m <sup>2</sup> /g) |
|---------------|-------------------|----------------------------------------------------|
| 5M HCl 24h    | 14.75             | 183.06                                             |
| 1M HCl 24h    | 16.59             | 296.05                                             |
| 0.1M NaOH 24h | 15.43             | 240.42                                             |
